# Supplementary material for: NNT-AS1 in CAFs-derived exosomes promotes progression and glucose metabolism through miR-889-3p/HIF-1α in pancreatic adenocarcinoma
Source: PubMed Central journal article supplement (PMC10960871; doi:10.1038/s41598-024-57769-6), 2024-03-24
Supplement: 41598_2024_57769_MOESM1_ESM.pdf [file 41598_2024_57769_MOESM1_ESM.pdf]

Fig-1 D

|             | CD9                                                                               | CD63                                                                               | $\beta$ -actin                                                                      |
|-------------|-----------------------------------------------------------------------------------|------------------------------------------------------------------------------------|-------------------------------------------------------------------------------------|
| repetition1 | 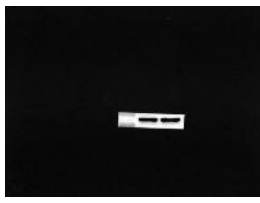 |  |  |
| Repetition2 |  |  |  |
| Repetition3 |  |  |  |

Fig-2G

|             |                | PKM2                                                                                | LDH                                                                                  | $\beta$ -actin                                                                        |
|-------------|----------------|-------------------------------------------------------------------------------------|--------------------------------------------------------------------------------------|---------------------------------------------------------------------------------------|
| Repetition1 | overexpression | 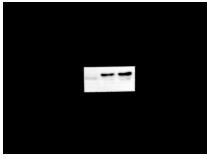 |  |  |
|             | knockdown      |  |  |  |
| Repetition2 | overexpression |  |  |  |
|             | knockdown      |  |  |  |

|             |                |                                                                                   |                                                                                    |                                                                                     |
|-------------|----------------|-----------------------------------------------------------------------------------|------------------------------------------------------------------------------------|-------------------------------------------------------------------------------------|
| Repetition3 | overexpression | 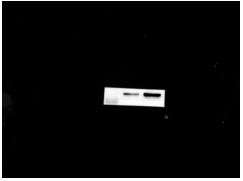 |  |  |
|             | knockdown      |  |  |  |

Fig-2K:

|             |                | SDH                                                                                 | FH                                                                                   | $\beta$ -actin                                                                        |
|-------------|----------------|-------------------------------------------------------------------------------------|--------------------------------------------------------------------------------------|---------------------------------------------------------------------------------------|
| Repetition1 | overexpression | 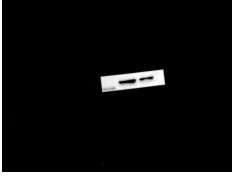   |    |    |
|             | knockdown      |   |   |   |
| Repetition2 | overexpression |  |  |  |
|             | knockdown      |  |  |  |
| Repetition3 | overexpression |  |  |  |
|             | knockdown      |  |  |  |

Fig3-I

|             | PKM2                                                                              | LDH                                                                                | $\beta$ -actin                                                                      |
|-------------|-----------------------------------------------------------------------------------|------------------------------------------------------------------------------------|-------------------------------------------------------------------------------------|
| Repetition1 | 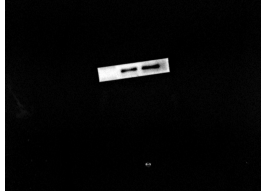 |  |  |
| Repetition2 |  |  |  |
| Repetition3 |  |  |  |

Fig3-L

|             | SDH                                                                                 | FH                                                                                   | $\beta$ -actin                                                                        |
|-------------|-------------------------------------------------------------------------------------|--------------------------------------------------------------------------------------|---------------------------------------------------------------------------------------|
| Repetition1 | 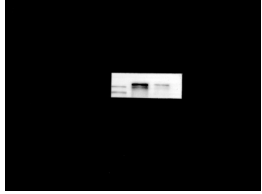 |  |  |
| Repetition2 |  |  |  |
| Repetition3 |  |  |  |

Fig4-H

|             | PKM2                                                                                | LDH                                                                                  | $\beta$ -actin                                                                        |
|-------------|-------------------------------------------------------------------------------------|--------------------------------------------------------------------------------------|---------------------------------------------------------------------------------------|
| Repetition1 | 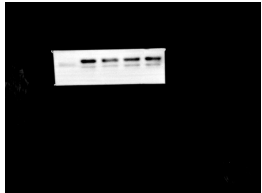 |  |  |

|             |                                                                                   |                                                                                    |                                                                                     |
|-------------|-----------------------------------------------------------------------------------|------------------------------------------------------------------------------------|-------------------------------------------------------------------------------------|
| Repetition2 | 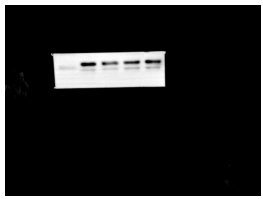 |  |  |
| Repetition3 |  |  |  |

Fig 4-K

|             | SDH                                                                                 | FH                                                                                   | $\beta$ -actin                                                                        |
|-------------|-------------------------------------------------------------------------------------|--------------------------------------------------------------------------------------|---------------------------------------------------------------------------------------|
| Repetition1 | 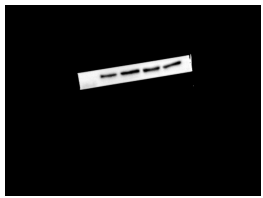   |    |    |
| Repetition2 |   |   |   |
| Repetition3 |  |  |  |
